# Supplementary material for: Pristimerin Exacerbates Cellular Injury in Conditionally Reprogrammed Patient-Derived Lung Adenocarcinoma Cells by Aggravating Mitochondrial Impairment and Endoplasmic Reticulum Stress through EphB4/CDC42/N-WASP Signaling
Source: Oxid Med Cell Longev. 2020 Jul 10;2020:7409853. doi: 10.1155/2020/7409853 (PMC7369684; doi:10.1155/2020/7409853)
Supplement: Supplementary Materials — This section includes (1) original data.docx, (2) ROS-si-EphB4-original.xlsx, and (3) ROS-si-N-WASP-original.xlsx. [file 7409853.f1.zip]

Archive with 3 entries (3 files):
- Original data.docx
- ROS-si-EphB4-original.xlsx
- ROS-si-N-WASP-original.xlsx
