# Supplementary material for: Pristimerin Exacerbates Cellular Injury in Conditionally Reprogrammed Patient-Derived Lung Adenocarcinoma Cells by Aggravating Mitochondrial Impairment and Endoplasmic Reticulum Stress through EphB4/CDC42/N-WASP Signaling
Source: Oxid Med Cell Longev. 2020 Jul 10;2020:7409853. doi: 10.1155/2020/7409853 (PMC7369684; doi:10.1155/2020/7409853)
Supplement: Supplementary Materials — This section includes (1) original data.docx, (2) ROS-si-EphB4-original.xlsx, and (3) ROS-si-N-WASP-original.xlsx. [file 7409853.f1.zip › ROS-si-EphB4-original.xlsx]

## Sheet: Sheet0
Shaking (Linear) Duration:				2	s
Shaking (Linear) Amplitude:				1	mm
Label: Label1
Mode				Fluorescence Top Reading
Excitation Wavelength				488	nm
Emission Wavelength				520	nm
Excitation Bandwidth				9	nm
Emission Bandwidth				20	nm
Gain				120	Manual
Number of Flashes				10
Integration Time				20	µs
Lag Time				0	µs
Settle Time				0	ms
Z-Position (Manual)				20000	µm
Start Time:	09.02.2019 14:32:50
	Temperature: 16.8 °C
End Time:	09.02.2019 14:33:32
								mean
n1	Control	8011	9859	11858	10425	8687	8245	9514.17		9514.17		9.51417
	PRIS	23150	24995	16086	19278	20938	17285	20288.7		10669.8		10.6698
	EphB4 siRNA	34615	34522	32148	31258	28148	30447	31856.3		12132		12.132
	PRIS+EphB4 siRNA	34873	35106	36852	32488	31785	32178	33880.3		13619.2		13.6192
										11264.8		11.2648
n2	Control	13011	12094	10574	9233	9475	9632	10669.8		10330.8		10.3308
	PRIS	24182	24122	27185	22146	20893	25154	23947
	EphB4 siRNA	34115	34277	32158	36258	37566	32675	34508.2		20288.7		20.2887
	PRIS+EphB4 siRNA	33395	39079	36547	36289	35199	32720	35538.2		23947		23.947
										23978.3		23.9783
n3	Control	9730	11086	14242	12454	12045	13235	12132		25376.2		25.3762
	PRIS	26390	28149	21342	23823	21048	23118	23978.3		20763		20.763
	EphB4 siRNA	33881	34218	36247	35148	31756	29172	33403.7		22441.2		22.4412
	PRIS+EphB4 siRNA	33323	36719	39180	32725	36174	39282	36233.8
										31856.3		31.8563
n4	Control	12290	13709	10518	13248	15088	16862	13619.2		34508.2		34.5082
	PRIS	22691	22855	24961	26753	28739	26258	25376.2		33403.7		33.4037
	EphB4 siRNA	33327	33797	29278	23477	26247	27475	28933.5		28933.5		28.9335
	PRIS+EphB4 siRNA	33448	33733	35254	31489	31276	38729	33988.2		32514.5		32.5145
										34347.7		34.3477
n5	Control	13532	14566	10183	10588	9706	9014	11264.8
	PRIS	23596	24464	20716	17070	21457	17275	20763		33880.3		33.8803
	EphB4 siRNA	32916	33705	33948	36577	25753	32188	32514.5		35538.2		35.5382
	PRIS+EphB4 siRNA	33462	34417	32944	29277	27289	30174	31260.5		36233.8		36.2338
										33988.2		33.9882
n6	Control	11705	10223	8572	12345	9674	9466	10330.8		31260.5		31.2605
	PRIS	22403	22439	22122	21244	24891	21548	22441.2		37417.3		37.4173
	EphB4 siRNA	32791	33253	33054	38607	35607	32774	34347.7
	PRIS+EphB4 siRNA	36094	35697	36790	37157	40751	38015	37417.3
	mean	sd
Control	11255.1	1455.03
PRIS	22799.1	1996.28
EphB4 siRNA	32594	2066.14
PRIS+EphB4 siRNA	34719.7	2165.43
