# Supplementary material for: Pristimerin Exacerbates Cellular Injury in Conditionally Reprogrammed Patient-Derived Lung Adenocarcinoma Cells by Aggravating Mitochondrial Impairment and Endoplasmic Reticulum Stress through EphB4/CDC42/N-WASP Signaling
Source: Oxid Med Cell Longev. 2020 Jul 10;2020:7409853. doi: 10.1155/2020/7409853 (PMC7369684; doi:10.1155/2020/7409853)
Supplement: Supplementary Materials — This section includes (1) original data.docx, (2) ROS-si-EphB4-original.xlsx, and (3) ROS-si-N-WASP-original.xlsx. [file 7409853.f1.zip › ROS-si-N-WASP-original.xlsx]

## Sheet: Sheet0
Shaking (Linear) Duration:				2	s
Shaking (Linear) Amplitude:				1	mm
Label: Label1
Mode				Fluorescence Top Reading
Excitation Wavelength				488	nm
Emission Wavelength				520	nm
Excitation Bandwidth				9	nm
Emission Bandwidth				20	nm
Gain				120	Manual
Number of Flashes				10
Integration Time				20	µs
Lag Time				0	µs
Settle Time				0	ms
Z-Position (Manual)				20000	µm
Start Time:	10.05.2019 22:07:05
	Temperature: 24.6 °C
End Time:	10.05.2019 22:07:46
								mean		11482.5		11.4825
n1	Control	13086	10832	12652	10040	12977	9308	11482.5		10766.7		10.7667
	PRIS	22749	27505	22465	23946	24763	27395	24803.8		12524.8		12.5248
	N-WASP siRNA	32866	23767	32888	37063	28276	35508	31728		10098		10.098
	PRIS+N-WASP siRNA	31763	28722	26108	28599	32433	30626	29708.5		10137.3		10.1373
n2	Control	9019	8668	11257	11596	11956	12104	10766.7		24803.8		24.8038
	PRIS	28177	24839	20107	21462	26675	26628	24648		24648		24.648
	N-WASP siRNA	28410	33427	35686	37173	34755	31212	33443.8		21397.2		21.3972
	PRIS+N-WASP siRNA	26588	23690	25488	30127	30237	29871	27666.8		20757		20.757
										22241.5		22.2415
n3	Control	12736	8974	13977	13559	10575	15328	12524.8
	PRIS	22042	20535	23892	23159	17382	21373	21397.2		31728		31.728
	N-WASP siRNA	32797	32749	36853	33310	28283	34439	33071.8		33443.8		33.4438
	PRIS+N-WASP siRNA	32781	29984	34693	32323	35277	26463	31920.2		33071.8		33.0718
										28582.3		28.5823
n4	Control	9036	9532	8537	10484	12529	10470	10098		29997.5		29.9975
	PRIS	20490	19389	21844	23745	18783	20291	20757
	N-WASP siRNA	26498	27183	33859	26268	21312	36374	28582.3		29708.5		29.7085
	PRIS+N-WASP siRNA	30278	26462	29285	29211	32465	30284	29664.2		27666.8		27.6668
										31920.2		31.9202
n5	Control	10594	8826	8938	11578	10831	10057	10137.3		29664.2		29.6642
	PRIS	20586	24232	18145	21447	22146	26893	22241.5		28447.2		28.4472
	N-WASP siRNA	30248	30623	25785	27347	30108	35874	29997.5
	PRIS+N-WASP siRNA	25387	28473	35842	23186	28377	29418	28447.2
	mean	stdev
Control	11001.9	1021.05
PRIS	22769.5	1862.76
N-WASP siRNA	31364.7	2060.33
PRIS+N-WASP siRNA	29481.4	1612.05
